# Supplementary material for: The Interactions between the Long Non-coding RNA NERDL and Its Target Gene Affect Wood Formation in Populus tomentosa
Source: Front Plant Sci. 2017 Jun 15;8:1035. doi: 10.3389/fpls.2017.01035 (PMC5475392; doi:10.3389/fpls.2017.01035)
Supplement: Supplementary file 5 [file Table_2.DOC]

***Table S2*** *Signiﬁcant SNPs associated with all traits calculated by MLM and the additive effect, dominant effect, and r2 (phenotypic contributions) of the SNPs from NERDL and PtoNERD associated with each trait in the association population of Populus tomentosa.*

| Position | Associated traits | SNPs locus | Position | P-value | Q-value | Additive effect(%) | Dominant effect(%) | R2 (%) |
| --- | --- | --- | --- | --- | --- | --- | --- | --- |
| NERDL |  |  |  |  |  |  |  |  |
|  | AC (%) | SNP9 | - | 5.64E-04 | 6.78E-02 | 11.82 | 7.88 | 5.64 |
|  | D (cm) | SNP18 | - | 5.93E-04 | 6.85E-02 | 2.43 | -9.98 | 6.10 |
|  |  | L23/N3 | Promoter(NERD) | 2.69E-05 | 6.01E-02 | 6.45 | 3.65 | 4.70 |
|  | HEC (%) | SNP8 | - | 3.37E-04 | 6.03E-02 | 12.82 | -10.34 | 5.92 |
|  |  | SNP9 | - | 5.05E-04 | 6.53E-02 | 12.95 | -9.56 | 6.54 |
| *PtoNERD* |  |  |  |  |  |  |  |  |
|  | AC (%) | SNP12 | Promoter | 4.14E-04 | 7.57E-02 | 14.50 | 12.32 | 6.88 |
|  |  | SNP103 | EXON11 | 8.60E-04 | 8.13E-02 | 7.85 | 6.80 | 6.10 |
|  | D (cm) | L23/N3 | Promoter | 2.69E-05 | 6.01E-02 | 6.45 | 3.65 | 4.70 |
|  |  | SNP30 | EXON1 | 5.36E-04 | 7.82E-02 | 0.80 | -1.82 | 4.21 |
|  |  | SNP31 | EXON1 | 5.52E-04 | 7.83E-02 | 3.56 | 0.90 | 5.03 |
|  |  | SNP50 | INTRON3 | 6.32E-04 | 7.87E-02 | 6.09 | 7.42 | 4.69 |
|  |  | SNP54 | INTRON3 | 6.64E-04 | 7.88E-02 | 0.86 | 0.55 | 4.39 |
|  |  | SNP73 | INTRON4 | 7.35E-04 | 7.89E-02 | 3.51 | 2.37 | 4.33 |
|  |  | SNP131 | 3'UTR | 9.88E-04 | 8.15E-02 | 5.71 | 3.84 | 5.50 |
|  | FW (µm) | SNP9 | Promoter | 1.36E-04 | 7.13E-02 | 1.06 | 2.42 | 3.90 |
|  |  | SNP11 | Promoter | 2.32E-04 | 7.35E-02 | 0.52 | 0.61 | 7.46 |
|  |  | SNP12 | Promoter | 3.36E-04 | 7.45E-02 | 2.80 | -1.44 | 8.57 |
|  |  | SNP15 | Promoter | 4.37E-04 | 7.69E-02 | 1.13 | 2.74 | 5.67 |
|  |  | SNP16 | Promoter | 4.93E-04 | 7.71E-02 | 1.15 | 2.47 | 5.38 |
|  |  | SNP18 | Promoter | 4.99E-04 | 7.75E-02 | 0.54 | -0.03 | 4.52 |
|  |  | SNP19 | Promoter | 5.05E-04 | 7.80E-02 | 1.30 | 2.24 | 4.52 |
|  |  | SNP20 | Promoter | 5.19E-04 | 7.81E-02 | 0.65 | 1.47 | 6.14 |
|  |  | SNP21 | Promoter | 5.29E-04 | 7.81E-02 | 0.55 | 0.62 | 6.11 |
|  |  | SNP33ns | EXON1 | 5.59E-04 | 7.85E-02 | 1.45 | -1.45 | 4.13 |
|  |  | SNP49 ns | EXON2 | 5.78E-04 | 7.86E-02 | 0.22 | 0.26 | 4.58 |
|  |  | SNP75 ns | EXON6 | 7.41E-04 | 7.89E-02 | 3.42 | -2.30 | 7.67 |
|  |  | SNP78 | INTRON6 | 7.53E-04 | 7.90E-02 | 0.42 | 2.45 | 7.35 |
|  |  | SNP105 | EXON11 | 9.65E-04 | 8.14E-02 | 1.07 | 2.37 | 6.24 |
|  | HEC (%) | SNP5 | Promoter | 5.02E-05 | 6.41E-02 | 9.33 | -5.40 | 4.10 |
|  |  | SNP8 | Promoter | 1.15E-04 | 6.92E-02 | 6.16 | 9.37 | 4.46 |
|  |  | SNP9 | Promoter | 1.20E-04 | 7.03E-02 | 6.26 | 8.00 | 4.74 |
|  |  | SNP10 | Promoter | 2.10E-04 | 7.27E-02 | 5.28 | 11.77 | 5.99 |
|  |  | SNP11 | Promoter | 3.27E-04 | 7.37E-02 | 2.10 | 3.28 | 4.98 |
|  |  | SNP105 | EXON11 | 9.73E-04 | 8.15E-02 | 5.18 | 10.99 | 5.96 |
|  | LC (%) | SNP93 | INTRON8 | 7.85E-04 | 8.25E-02 | 0.17 | -0.05 | 4.46 |
